# INFOGRAPHICS IN ANESTHESIOLOGY

Complex Information for Anesthesiologists Presented Quickly and Clearly

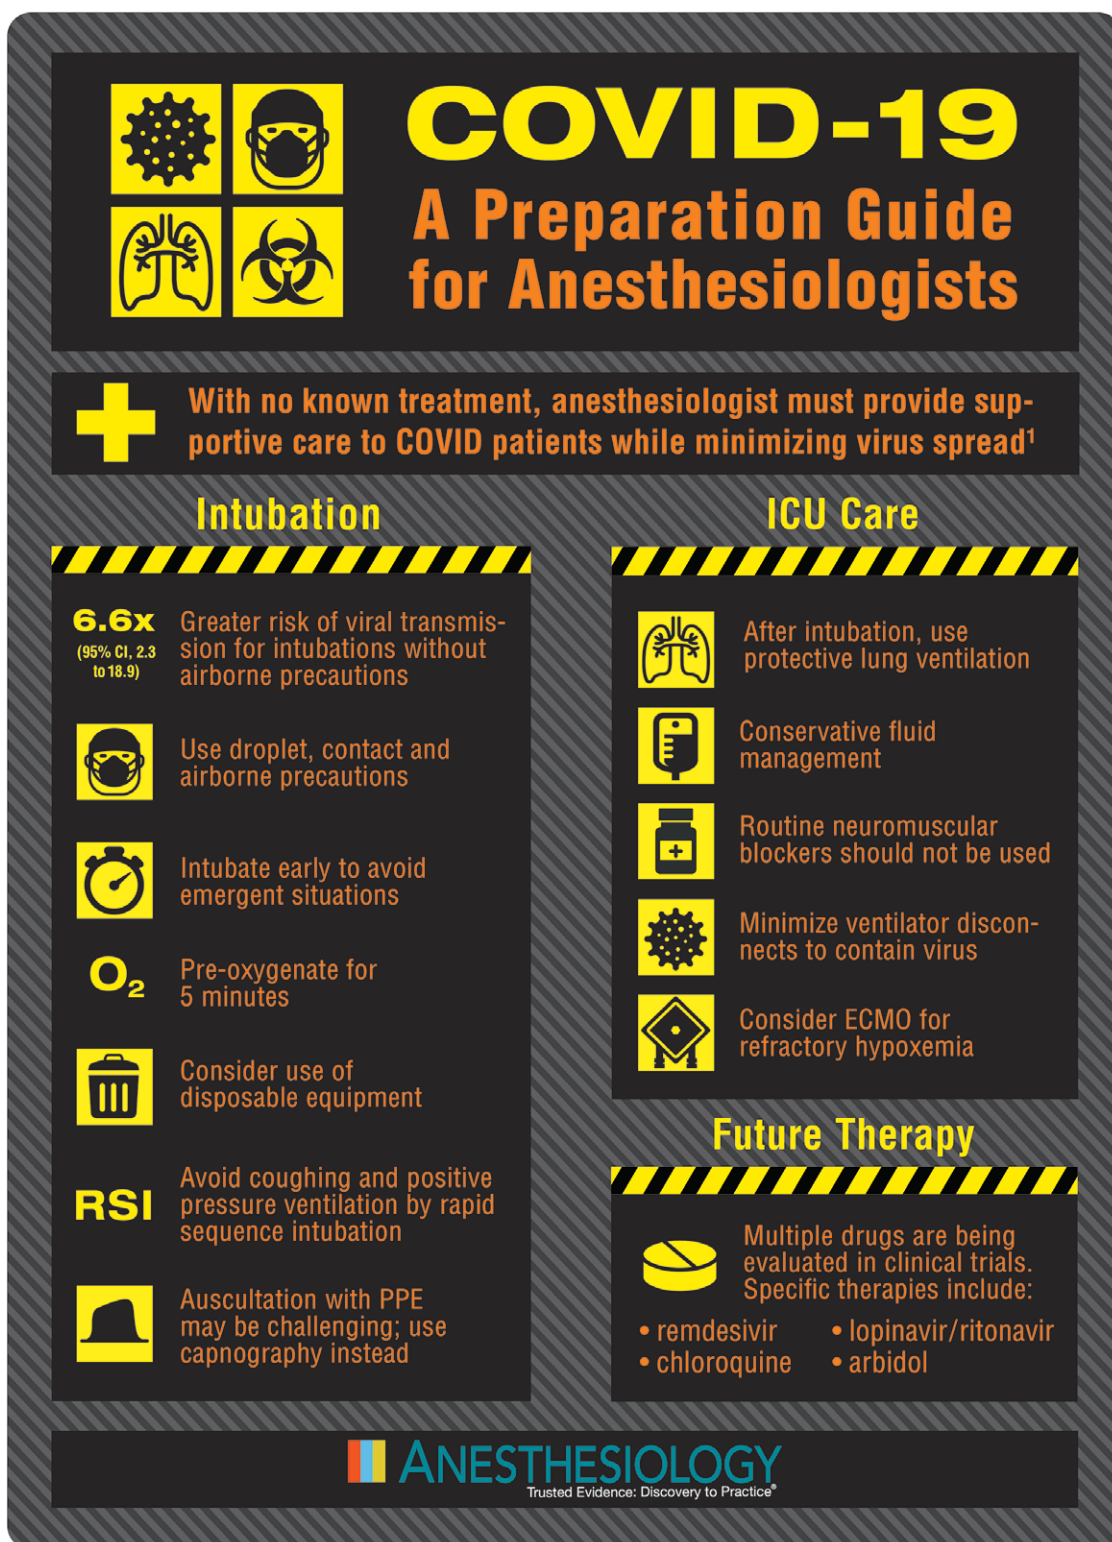

ECMO, extracorporeal membrane oxygenation; PPE, personal protective equipment; RSI, rapid sequence intubation.

Infographic created by Jonathan P. Wanderer, Vanderbilt University Medical Center, and James P. Rathmell, Brigham and Women's Health Care/Harvard Medical School. Illustration by Annemarie Johnson, Vivo Visuals. Address correspondence to Dr. Wanderer: [jon.wanderer@vmc.org](mailto:jon.wanderer@vmc.org).

1. Greenland JR, Michelow MD, Wang L, London MJ: COVID-19 infection: Implications for perioperative and critical care physicians. *ANESTHESIOLOGY* 2020; 132:1346–61
